# Supplementary material for: De novo assembly and annotation of the Zhe-Maidong (Ophiopogon japonicus (L.f.) Ker-Gawl) transcriptome in different growth stages
Source: PubMed Central journal article supplement (PMC5472570; doi:10.1038/s41598-017-03937-w), 2017-06-15
Supplement: 41598_2017_3937_MOESM9_ESM.pdf [file 41598_2017_3937_MOESM9_ESM.pdf]

## Supplementary Information

### ***De novo* assembly and annotation of the Zhe-Maidong (*Ophiopogon japonicus* (L.f.) Ker-Gawl) transcriptome in different growth stages**

HuijunLiu<sup>1</sup>, Ying Wang<sup>2,3</sup>, Tingzhang Wang<sup>2,3</sup>, Xuhui Ying<sup>6</sup>, Rongrong Wu<sup>4,5,\*</sup>, Huan Chen<sup>1,2,3,\*</sup>

<sup>1</sup>College of Pharmaceutical Science, Zhejiang University of Technology, Hangzhou 310014, China

<sup>2</sup>Zhejiang Institute of Microbiology, Hangzhou 310012, China

<sup>3</sup>Key laboratory of microbial technology and bioinformatics of Zhejiang Province, Hangzhou 310012, China

<sup>4</sup>Department of Cardiology, Second Affiliated Hospital, College of Medicine, Zhejiang University, Hangzhou, 310009, China

<sup>5</sup>Cardiovascular Key Laboratory of Zhejiang Province, Hangzhou, 310009, China

<sup>6</sup>ChiaTaiQingchunbao Pharmaceutical Co., Ltd

\*To whom correspondence should be addressed.

Huan Chen, E-mail address: [chenhuan7809@gmail.com](mailto:chenhuan7809@gmail.com);

Rongrong Wu, E-mail address: [realagatha@zju.edu.cn](mailto:realagatha@zju.edu.cn)

## Supplementary Figures

**Figure S1** Three expression patterns were classified into biological process based on gene ontology(GO). Abbreviations: Up-down(red bar), genes with expression first increased and then decreased pattern; Down(green bar), genes with decreased expression pattern; Up(blue bar), genes with increased expression pattern.

**Figure S2** Three expression patterns were classified into cellular component based on gene ontology(GO). Abbreviations: Up-down(red bar), genes with expression first increased and then decreased pattern; Down(green bar), genes with decreased expression pattern; Up(blue bar), genes with increased expression pattern.

**Figure S3** Three expression patterns were classified into molecular function based on gene ontology(GO). Abbreviations: Up-down(red bar), genes with expression first increased and then decreased pattern; Down(green bar), genes with decreased expression pattern; Up(blue bar), genes with increased expression pattern.

Figure S1

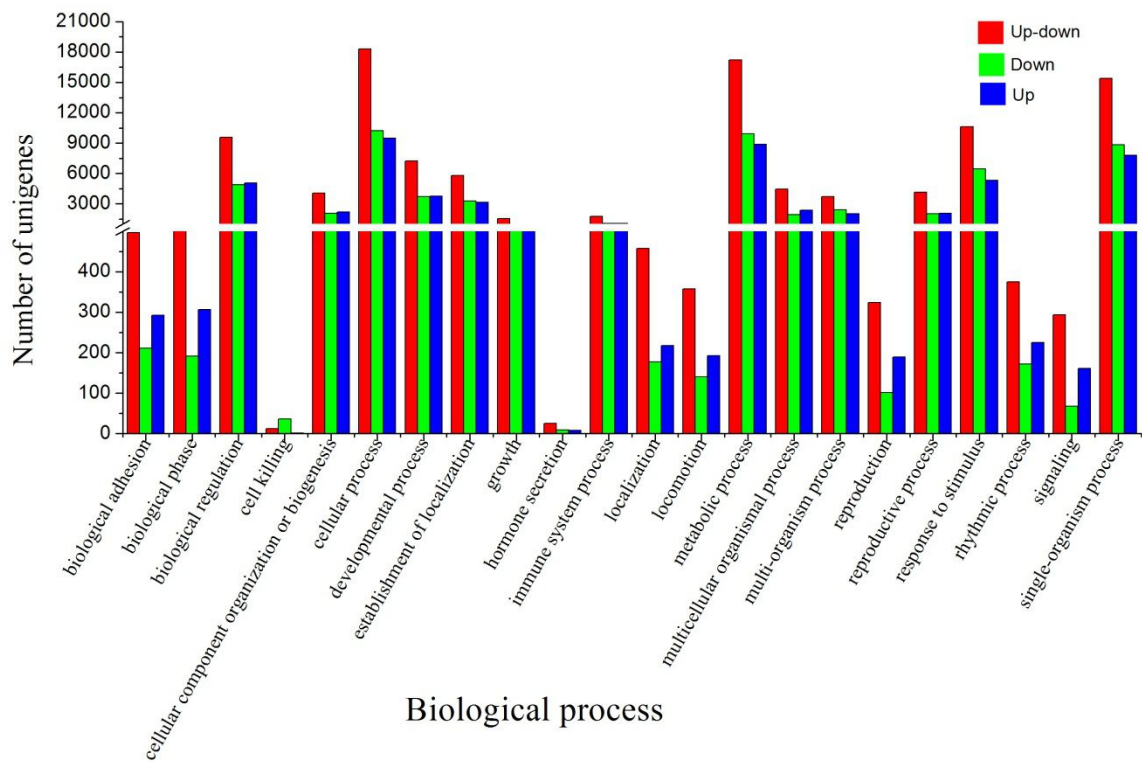

Figure S1 Three expression patterns were classified into biological process based on gene ontology(GO). Abbreviations: Up-down(red bar), genes with expression first increased and then decreased pattern; Down(green bar), genes with decreased expression pattern; Up(blue bar), genes with increased expression pattern.

Figure S2

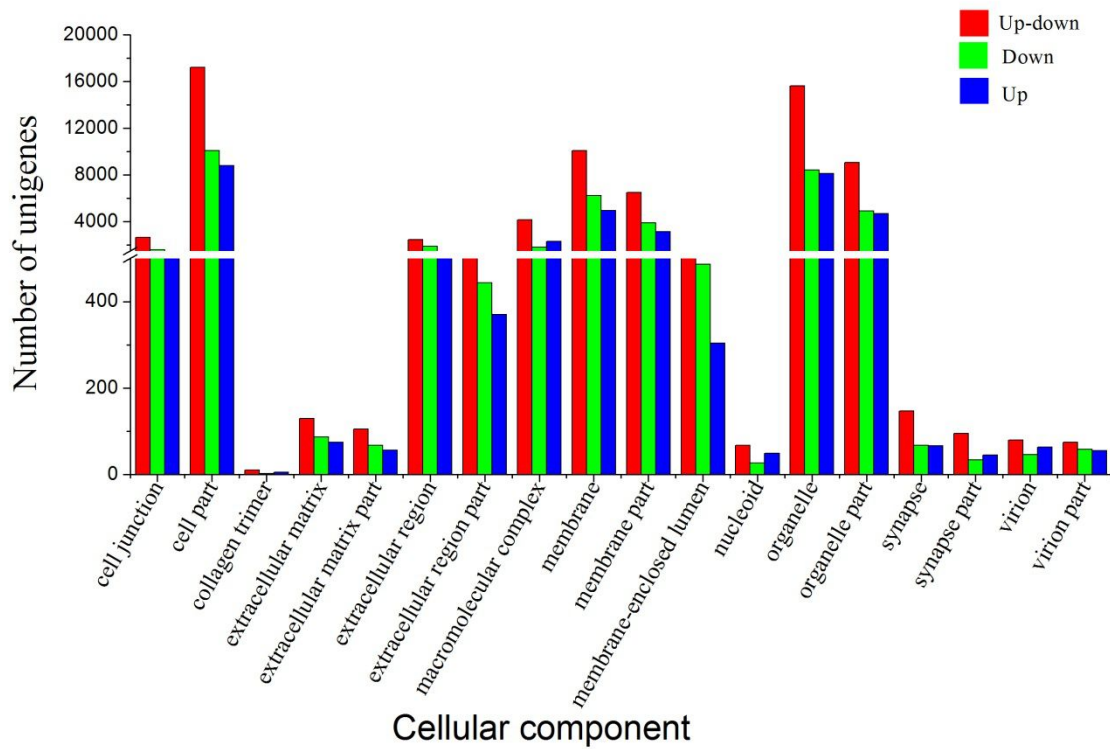

Figure S2 Three expression patterns were classified into cellular component based on gene ontology(GO). Abbreviations: Up-down(red bar), genes with expression first increased and then decreased pattern; Down(green bar), genes with decreased expression pattern; Up(blue bar), genes with increased expression pattern.

Figure S3

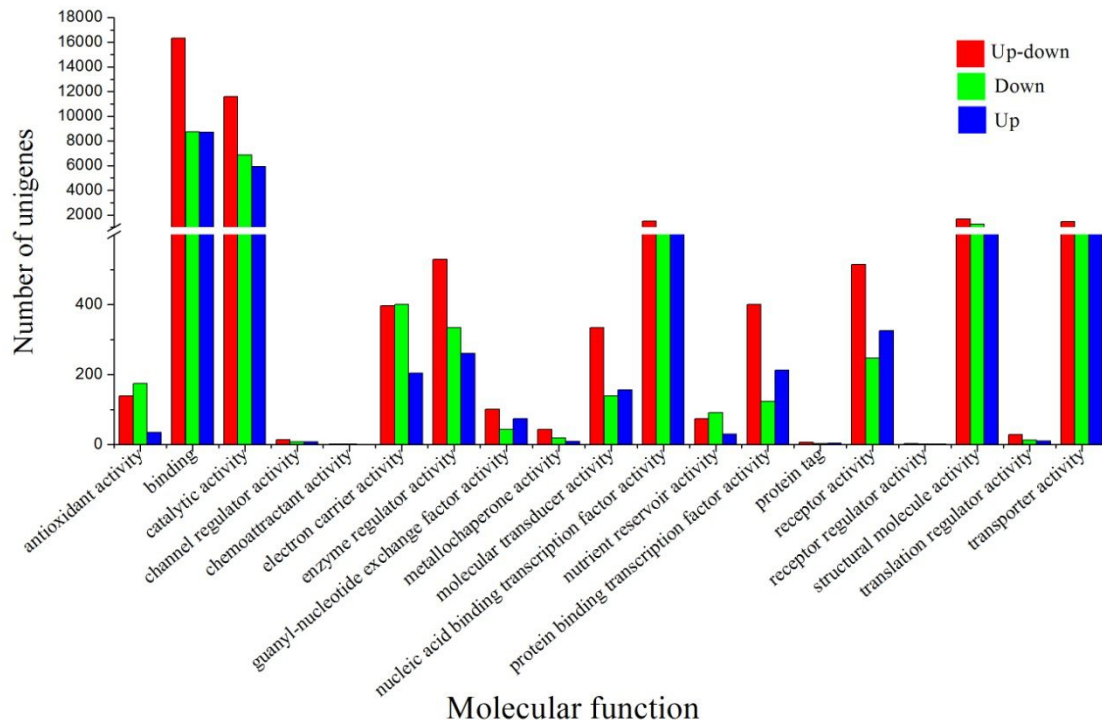

Figure S3 Three expression patterns were classified into molecular function based on gene ontology(GO). Abbreviations: Up-down(red bar), genes with expression first increased and then decreased pattern; Down(green bar), genes with decreased expression pattern; Up(blue bar), genes with increased expression pattern.
